# Supplementary material
Source: PubMed Central journal article supplement (PMC5833232)

## Supplementary Material 4: Efficacy results of probiotics for antibiotic-associated diarrhea and publication bias

**Table S4.1. Network and traditional meta-analysis results for the incidence of diarrhea, and quality of evidence.**

| Interventions                        | Incidence of diarrhea |                     |                      |                     |
|--------------------------------------|-----------------------|---------------------|----------------------|---------------------|
|                                      | Network               | Quality of evidence | Pairwise             | Quality of evidence |
|                                      | meta-analysis         |                     | meta-analysis        |                     |
| OR<br>(95% CI)                       |                       | OR<br>(95% CI)      |                      |                     |
| Multi-genera II vs. Placebo          | 0.55<br>(0.41, 0.75)  | Low*†               | 0.71<br>(0.60, 0.83) | Low*†               |
| Multi-genera III vs. Placebo         | 0.94<br>(0.63, 1.43)  | Moderate*           | 0.94<br>(0.68, 1.31) | Moderate†           |
| LGG vs. Placebo                      | 0.24<br>(0.14, 0.42)  | Moderate*‡ψ         | 0.26<br>(0.17, 0.40) | Moderate*ψ          |
| <i>L. rhamnosus</i> vs. Placebo      | 0.46<br>(0.19, 1.13)  | Moderate*           | 0.46<br>(0.24, 0.92) | Moderate*ψ          |
| <i>L. casei</i> vs. Placebo          | 0.24<br>(0.10, 0.57)  | Moderate*ψ          | 0.27<br>(0.16, 0.46) | Moderate*ψ          |
| <i>L. acidophilus</i> vs. Placebo    | 0.41<br>(0.26, 0.65)  | Moderate*‡ψ         | 0.46<br>(0.34, 0.61) | Moderate*ψ          |
| <i>L. reuteri</i> vs. Placebo        | 0.46<br>(0.14, 1.59)  | Moderate*†ψ         | 0.45<br>(0.16, 1.26) | Low*†ψ              |
| <i>L. plantarum</i> vs. Placebo      | 0.82<br>(0.18, 3.70)  | Low*‡               | 0.82<br>(0.22, 3.14) | Moderate*           |
| <i>B. clausii</i> vs. Placebo        | 0.26<br>(0.07, 0.94)  | Moderate*ψ          | 0.29<br>(0.11, 0.77) | Moderate*ψ          |
| <i>S. boulardii</i> vs. Placebo      | 0.35<br>(0.24, 0.51)  | Moderate*†ψ         | 0.36<br>(0.28, 0.46) | Low*†               |
| Multi-genera III vs. Multi-genera II | 1.70<br>(1.03, 2.80)  | Moderate*†ψ         | 1.68<br>(0.69, 4.08) | Moderate*†ψ         |

|                                            |                   |             |                   |        |
|--------------------------------------------|-------------------|-------------|-------------------|--------|
| LGG vs. Multi-genera II                    | 0.43 (0.23, 0.82) | Moderate*†ψ | 0.53 (0.11, 2.59) | Low*†ψ |
| <i>L. rhamnosus</i> vs. Multi-genera II    | 0.84 (0.33, 2.14) | Low*†       | NA                | NA     |
| <i>L. casei</i> vs. Multi-genera II        | 0.43 (0.17, 1.08) | Moderate*ψ  | NA                | NA     |
| <i>L. acidophilus</i> vs. Multi-genera II  | 0.75 (0.44, 1.28) | Moderate*†ψ | NA                | NA     |
| <i>L. reuteri</i> vs. Multi-genera II      | 0.84 (0.24, 2.96) | Very low*†‡ | NA                | NA     |
| <i>L. plantarum</i> vs. Multi-genera II    | 1.48 (0.32, 6.82) | Very low*†‡ | NA                | NA     |
| <i>B. clausii</i> vs. Multi-genera II      | 0.47 (0.12, 1.75) | Low*†‡ψ     | NA                | NA     |
| <i>S. boulardii</i> vs. Multi-genera II    | 0.63 (0.40, 1.01) | Moderate*†ψ | 0.53 (0.11, 2.59) | Low*†ψ |
| LGG vs. Multi-genera III                   | 0.26 (0.13, 0.67) | Moderate*†ψ | NA                | NA     |
| <i>L. rhamnosus</i> vs. Multi-genera III   | 0.49 (0.18, 1.31) | Moderate†   | NA                | NA     |
| <i>L. casei</i> vs. Multi-genera III       | 0.26 (0.10, 0.67) | Moderate*†ψ | NA                | NA     |
| <i>L. acidophilus</i> vs. Multi-genera III | 0.44 (0.24, 0.81) | Moderate*ψ  | NA                | NA     |
| <i>L. reuteri</i> vs. Multi-genera III     | 0.49 (0.13, 1.81) | Low*†‡ψ     | NA                | NA     |
| <i>L. plantarum</i> vs. Multi-genera III   | 0.87 (0.18, 4.16) | Very low*†‡ | NA                | NA     |
| <i>B. clausii</i> vs. Multi-genera III     | 0.28 (0.07, 1.07) | Low*†‡ψ     | NA                | NA     |
| <i>S. boulardii</i> vs. Multi-genera III   | 0.37 (0.21, 0.65) | Moderate*ψ  | NA                | NA     |
| <i>L. rhamnosus</i> vs. LGG                | 1.93              | High        | NA                | NA     |

---

|                                               |                       |             |                      |           |
|-----------------------------------------------|-----------------------|-------------|----------------------|-----------|
|                                               | (0.50, 7.50)          |             |                      |           |
| <i>L. casei</i> vs. LGG                       | 1.00<br>(0.36, 2.81)  | Moderate*   | NA                   | NA        |
| <i>L. acidophilus</i> vs. LGG                 | 1.72<br>(0.83, 3.57)  | Moderate*   | NA                   | NA        |
| <i>L. reuteri</i> vs. LGG                     | 1.93<br>(0.50, 7.50)  | Moderate*   | NA                   | NA        |
| <i>L. plantarum</i> vs. LGG                   | 3.42<br>(0.68, 17.07) | Moderate*‡ψ | NA                   | NA        |
| <i>B. clausii</i> vs. LGG                     | 1.08<br>(0.26, 4.41)  | Low*‡       | NA                   | NA        |
| <i>S. boulardii</i> vs. LGG                   | 1.46<br>(0.75, 2.85)  | Moderate*   | 1.00<br>(0.18, 5.63) | Moderate* |
| <i>L. casei</i> vs. <i>L. rhamnosus</i>       | 0.52<br>(0.15, 1.78)  | Moderate‡   | NA                   | NA        |
| <i>L. acidophilus</i> vs. <i>L. rhamnosus</i> | 0.89<br>(0.33, 2.42)  | Moderate‡   | NA                   | NA        |
| <i>L. reuteri</i> vs. <i>L. rhamnosus</i>     | 1.00<br>(0.22, 4.57)  | Moderate‡   | NA                   | NA        |
| <i>L. plantarum</i> vs. <i>L. rhamnosus</i>   | 1.77<br>(0.31, 10.16) | Moderate‡   | NA                   | NA        |
| <i>B. clausii</i> vs. <i>L. rhamnosus</i>     | 0.56<br>(0.12, 2.67)  | Moderate‡   | NA                   | NA        |
| <i>S. boulardii</i> vs. <i>L. rhamnosus</i>   | 0.76<br>(0.29, 1.97)  | Moderate‡   | NA                   | NA        |
| <i>L. acidophilus</i> vs. <i>L. casei</i>     | 1.72<br>(0.65, 4.56)  | Very low*†‡ | NA                   | NA        |
| <i>L. reuteri</i> vs. <i>L. casei</i>         | 1.93<br>(0.43, 8.68)  | Very low*†‡ | NA                   | NA        |
| <i>L. plantarum</i> vs. <i>L. casei</i>       | 3.41<br>(0.60, 19.31) | Moderate*‡ψ | NA                   | NA        |
| <i>B. clausii</i> vs. <i>L. casei</i>         | 1.08<br>(0.23, 5.07)  | Low*‡       | NA                   | NA        |

---

|                                               |                       |             |    |    |
|-----------------------------------------------|-----------------------|-------------|----|----|
| <i>S. boulardii</i> vs. <i>L. casei</i>       | 1.46<br>(0.57, 3.71)  | Low*‡       | NA | NA |
| <i>L. reuteri</i> vs. <i>L. acidophilus</i>   | 1.12<br>(0.30, 4.16)  | Moderate*   | NA | NA |
| <i>L. plantarum</i> vs. <i>L. acidophilus</i> | 1.98<br>(0.41, 9.55)  | Moderate*   | NA | NA |
| <i>B. clausii</i> vs. <i>L. acidophilus</i>   | 0.63<br>(0.16, 2.45)  | Low*‡       | NA | NA |
| <i>S. boulardii</i> vs. <i>L. acidophilus</i> | 0.85<br>(0.47, 1.52)  | Low*†       | NA | NA |
| <i>L. plantarum</i> vs. <i>L. reuteri</i>     | 1.77<br>(0.25, 12.39) | Moderate*   | NA | NA |
| <i>B. clausii</i> vs. <i>L. reuteri</i>       | 0.56<br>(0.09, 3.32)  | Low*‡       | NA | NA |
| <i>S. boulardii</i> vs. <i>L. reuteri</i>     | 0.76<br>(0.21, 2.73)  | Moderate*   | NA | NA |
| <i>B. clausii</i> vs. <i>L. plantarum</i>     | 0.32<br>(0.04, 2.29)  | Moderate*‡ψ | NA | NA |
| <i>S. boulardii</i> vs. <i>L. plantarum</i>   | 0.43<br>(0.09, 2.01)  | Moderate*‡ψ | NA | NA |
| <i>S. boulardii</i> vs. <i>B. clausii</i>     | 1.35<br>(0.35, 5.15)  | Low*‡       | NA | NA |

Abbreviations: OR=odds ratio; CI=confidence interval; NA=not applicable.

\*Limitations in study design or execution (risk of bias); †Inconsistency in results; ¶Indirectness of evidence; ‡Imprecision of results; §Publication bias; ψMagnitude of the effect.

**Table S4.2. Traditional meta-analysis results for the incidence of diarrhea.**

| Interventions                           | Trails | Participants | Effect Estimate<br>OR (95% CI) | Heterogeneity                                                        |
|-----------------------------------------|--------|--------------|--------------------------------|----------------------------------------------------------------------|
| Multi-genera II vs. Placebo             | 16     | 5234         | 0.71 (0.60, 0.83)              | P=0.00, I <sup>2</sup> =59.2% (29.3%, 76.5%), tau <sup>2</sup> =0.23 |
| Multi-genera III vs. Placebo            | 9      | 1287         | 0.94 (0.68, 1.31)              | P=0.19, I <sup>2</sup> =32.8% (0%, 72.9%), tau <sup>2</sup> =0.09    |
| LGG vs. Placebo                         | 7      | 881          | 0.26 (0.17, 0.40)              | P=0.99, I <sup>2</sup> =0.0% (0.0%, 78.0%), tau <sup>2</sup> =0.00   |
| <i>L. rhamnosus</i> vs. Placebo         | 2      | 412          | 0.46 (0.24, 0.92)              | P=0.68, I <sup>2</sup> =0.0%, tau <sup>2</sup> =0.00                 |
| <i>L. casei</i> vs. Placebo             | 3      | 414          | 0.27 (0.16, 0.46)              | P=0.20, I <sup>2</sup> =36.9% (0.0%, 79.9%), tau <sup>2</sup> =0.16  |
| <i>L. acidophilus</i> vs. Placebo       | 5      | 904          | 0.46 (0.34, 0.61)              | P=0.51, I <sup>2</sup> =13.8% (0.0%, 53.8%), tau <sup>2</sup> =0.05  |
| <i>L. reuteri</i> vs. Placebo           | 2      | 63           | 0.45 (0.16, 1.26)              | P=0.51, I <sup>2</sup> =0.0%, tau <sup>2</sup> =0.00                 |
| <i>L. plantarum</i> vs. Placebo         | 1      | 163          | 0.82 (0.22, 3.14)              | NA                                                                   |
| <i>B. clausii</i> vs. Placebo           | 1      | 100          | 0.29 (0.11, 0.77)              | NA                                                                   |
| <i>S. boulardii</i> vs. Placebo         | 10     | 2078         | 0.36 (0.28, 0.46)              | P=0.07, I <sup>2</sup> =38.5% (0.0%, 70.7%), tau <sup>2</sup> =0.18  |
| Multi-genera III vs. Multi-genera II    | 1      | 39           | 1.68 (0.69, 4.08)              | NA                                                                   |
| LGG vs. Multi-genera II                 | 1      | 42           | 0.53 (0.11, 2.59)              | NA                                                                   |
| <i>S. boulardii</i> vs. Multi-genera II | 1      | 42           | 0.53 (0.11, 2.59)              | NA                                                                   |
| LGG vs. <i>S. boulardii</i>             | 1      | 42           | 1.00 (0.18, 5.63)              | NA                                                                   |

Abbreviations: CI=confidence interval; OR=odds ratio; NA=not applicable.

**Table S4.3. Traditional meta-analysis results for *C. difficile* infection rate.**

| Interventions                     | Trials | Participants | Effect Estimate<br>OR (95% CI) | Heterogeneity                                                       |
|-----------------------------------|--------|--------------|--------------------------------|---------------------------------------------------------------------|
| Multi-genera II vs. Placebo       | 6      | 3971         | 0.54 (0.35, 0.85)              | P=0.27, I <sup>2</sup> =21.0% (0.0%, 65.8%), tau <sup>2</sup> =0.12 |
| Multi-genera III vs. Placebo      | 2      | 104          | 0.30 (0.10, 0.89)              | P=0.72, I <sup>2</sup> =0.0%, tau <sup>2</sup> =0.00                |
| LGG vs. Placebo                   | 2      | 257          | 0.36 (0.14, 0.92)              | P=0.48, I <sup>2</sup> =0.0%, tau <sup>2</sup> =0.00                |
| <i>L. rhamnosus</i> vs. Placebo   | 1      | 240          | 0.35 (0.11, 1.12)              | NA                                                                  |
| <i>L. casei</i> vs. Placebo       | 1      | 258          | 0.16 (0.06, 0.47)              | NA                                                                  |
| <i>L. acidophilus</i> vs. Placebo | 5      | 904          | 0.22 (0.13, 0.38)              | P=0.44, I <sup>2</sup> =0.0% (0.0%, 79.2%), tau <sup>2</sup> =0.00  |
| <i>L. plantarum</i> vs. Placebo   | 1      | 150          | 1.03 (0.20, 5.24)              | NA                                                                  |
| <i>S. boulardii</i> vs. Placebo   | 3      | 839          | 0.35 (0.19, 0.63)              | P=0.18, I <sup>2</sup> =41.9% (0.0%, 82.2%), tau <sup>2</sup> =0.30 |

Abbreviations: CI=confidence interval; OR=odds ratio; NA=not applicable.

**Table S4.4. Summary table of meta-regression for the incidence of diarrhea.**

| <b>Covariate</b>  | <b>Coefficient (95% CI)</b> | <b>Standard Error</b> | <b><i>P</i> value</b> |
|-------------------|-----------------------------|-----------------------|-----------------------|
| Mean age          | 1.56 (1.13, 2.15)           | 0.25                  | 0.17                  |
| Sex ratio         | 1.43 (0.79, 2.57)           | 0.41                  | 0.76                  |
| Recruiting area   | 2.37 (0.56, 9.97)           | 1.68                  | 0.45                  |
| Antibiotic in use | 4.56 (2.09, 9.96)           | 1.77                  | 0.07                  |
| Indication        | 1.86 (1.06, 3.25)           | 0.51                  | 0.61                  |
| Dosage            | 1.70 (1.42, 2.03)           | 0.15                  | 0.45                  |
| Duration          | 1.75 (1.41, 2.19)           | 0.19                  | 0.97                  |

Abbreviations: CI=confidence interval.

**Figure S4.1. Forest plot of network meta-analysis for the efficacy outcomes compared with placebo arm.**

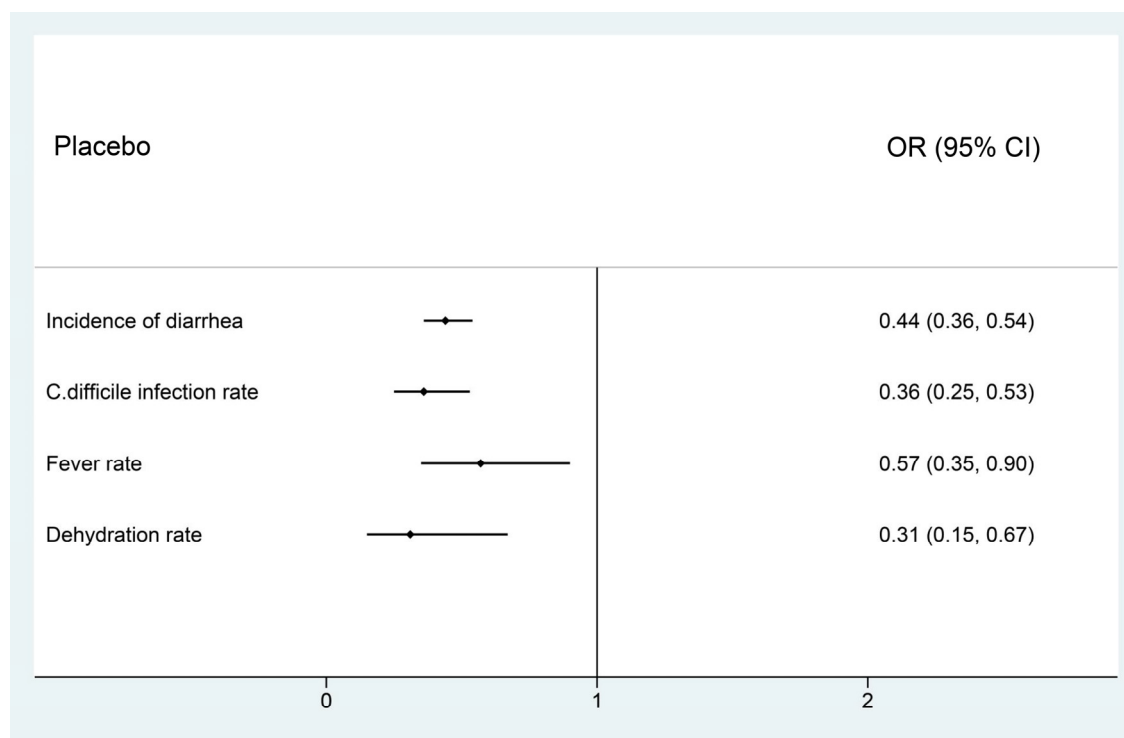



**Figure S4.2. Comparison-adjusted funnel plot of network analysis for the incidence of diarrhea compared with placebo arm.**

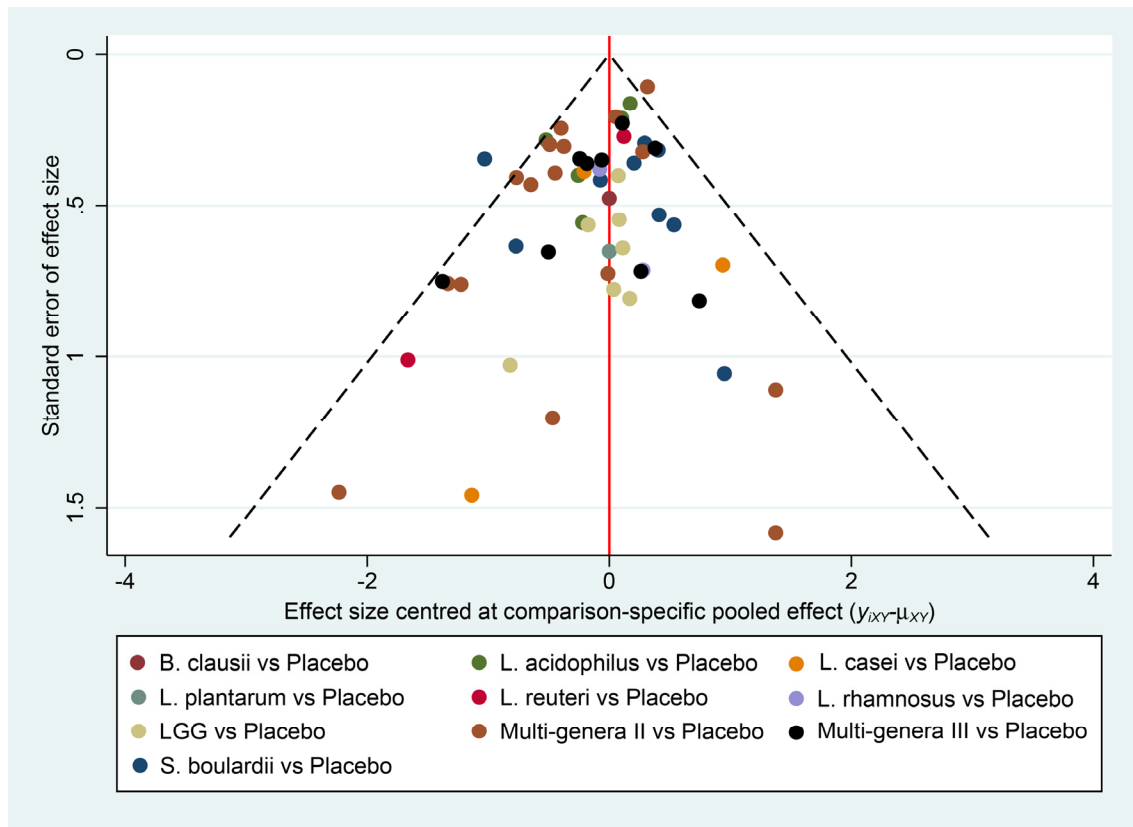

Supplement: Supplementary_Material4-R2.pdf [file Supplementary_Material4-R2.pdf]
