# Supplementary material
Source: PubMed Central journal article supplement (PMC5833232)

## Supplementary Material 5: Tolerability results of probiotics for antibiotic-associated diarrhea and publication bias

**Table S5.1. Network and traditional meta-analysis results for total occurrence of adverse events, and quality of evidence.**

| Interventions                        | Total occurrence of adverse events |                     |                      |                     |
|--------------------------------------|------------------------------------|---------------------|----------------------|---------------------|
|                                      | Network                            | Quality of evidence | Pairwise             | Quality of evidence |
|                                      | meta-analysis                      |                     | meta-analysis        |                     |
| OR<br>(95% CI)                       |                                    | OR<br>(95% CI)      |                      |                     |
| Multi-genera II vs. Placebo          | 0.49<br>(0.28, 0.87)               | Low*†§ψ             | 0.80<br>(0.68, 0.94) | Low*†§ψ             |
| Multi-genera III vs. Placebo         | 0.98<br>(0.46, 2.08)               | Moderate*           | 1.33<br>(0.98, 1.80) | Moderate*           |
| LGG vs. Placebo                      | 0.35<br>(0.14, 0.86)               | Moderate*ψ          | 0.27<br>(0.14, 0.52) | Moderate*ψ          |
| <i>L. rhamnosus</i> vs. Placebo      | 0.47<br>(0.05, 4.35)               | Low†‡ψ              | 0.39<br>(0.05, 2.80) | Low†‡ψ              |
| <i>L. casei</i> vs. Placebo          | 0.47<br>(0.14, 1.61)               | Moderate†ψ          | 0.48<br>(0.22, 1.04) | Moderate‡ψ          |
| <i>L. acidophilus</i> vs. Placebo    | 0.70<br>(0.29, 1.68)               | Moderate*           | 0.95<br>(0.67, 1.34) | Moderate*           |
| <i>L. reuteri</i> vs. Placebo        | 0.22<br>(0.03, 1.58)               | Low*†ψ              | 0.25<br>(0.06, 0.94) | Low*†ψ              |
| <i>L. plantarum</i> vs. Placebo      | 1.04<br>(0.13, 8.37)               | Low*‡               | 1.04<br>(0.20, 5.28) | Moderate*           |
| <i>B. clausii</i> vs. Placebo        | 0.40<br>(0.09, 1.87)               | Moderate*ψ          | 0.42<br>(0.19, 0.91) | Moderate*ψ          |
| <i>S. boulardii</i> vs. Placebo      | 0.43<br>(0.21, 0.86)               | Moderate†ψ          | 0.51<br>(0.36, 0.74) | Moderate†ψ          |
| Multi-genera III vs. Multi-genera II | 1.98<br>(0.81, 4.82)               | Very low*†§         | 0.65<br>(0.23, 1.84) | Very low*†‡§        |
| LGG vs. Multi-genera II              | 0.71                               | Low*†               | 1.33                 | Moderate*†ψ         |

|                                            |                       |              |                      |         |
|--------------------------------------------|-----------------------|--------------|----------------------|---------|
|                                            | (0.25, 1.99)          |              | (0.26, 6.83)         |         |
| <i>L. rhamnosus</i> vs. Multi-genera II    | 0.96<br>(0.10, 9.43)  | Very low*†‡  | NA                   | NA      |
| <i>L. casei</i> vs. Multi-genera II        | 0.95<br>(0.24, 3.68)  | Low*†        | NA                   | NA      |
| <i>L. acidophilus</i> vs. Multi-genera II  | 1.41<br>(0.50, 3.97)  | Low*†        | NA                   | NA      |
| <i>L. reuteri</i> vs. Multi-genera II      | 0.44<br>(0.05, 3.46)  | Low*†‡ψ      | NA                   | NA      |
| <i>L. plantarum</i> vs. Multi-genera II    | 2.10<br>(0.24, 18.21) | Low*†‡ψ      | NA                   | NA      |
| <i>B. clausii</i> vs. Multi-genera II      | 0.82<br>(0.16, 4.18)  | Very low*†‡  | NA                   | NA      |
| <i>S. boulardii</i> vs. Multi-genera II    | 0.87<br>(0.36, 2.08)  | Very low*†§  | 1.00<br>(0.18, 5.63) | Low*†§ψ |
| LGG vs. Multi-genera III                   | 0.36<br>(0.11, 1.16)  | Moderate*ψ   | NA                   | NA      |
| <i>L. rhamnosus</i> vs. Multi-genera III   | 0.48<br>(0.05, 5.03)  | Moderate*†‡ψ | NA                   | NA      |
| <i>L. casei</i> vs. Multi-genera III       | 0.48<br>(0.11, 2.03)  | Moderate*†ψ  | NA                   | NA      |
| <i>L. acidophilus</i> vs. Multi-genera III | 0.71<br>(0.23, 2.24)  | Moderate*    | NA                   | NA      |
| <i>L. reuteri</i> vs. Multi-genera III     | 0.22<br>(0.03, 1.86)  | Moderate*†‡ψ | NA                   | NA      |
| <i>L. plantarum</i> vs. Multi-genera III   | 1.06<br>(0.12, 9.75)  | Low*†        | NA                   | NA      |
| <i>B. clausii</i> vs. Multi-genera III     | 0.41<br>(0.08, 2.28)  | Moderate*†‡ψ | NA                   | NA      |
| <i>S. boulardii</i> vs. Multi-genera III   | 0.44<br>(0.16, 1.22)  | Moderate*†ψ  | NA                   | NA      |
| <i>L. rhamnosus</i> vs. LGG                | 1.35<br>(0.12, 14.73) | Moderate‡    | NA                   | NA      |
| <i>L. casei</i> vs. LGG                    | 1.33<br>(0.29, 6.14)  | High         | NA                   | NA      |

|                                               |                       |              |                      |        |
|-----------------------------------------------|-----------------------|--------------|----------------------|--------|
| <i>L. acidophilus</i> vs. LGG                 | 1.99<br>(0.56, 6.99)  | High         | NA                   | NA     |
| <i>L. reuteri</i> vs. LGG                     | 0.61<br>(0.07, 5.74)  | Moderate*    | NA                   | NA     |
| <i>L. plantarum</i> vs. LGG                   | 2.96<br>(0.31, 28.65) | Low*‡        | NA                   | NA     |
| <i>B. clausii</i> vs. LGG                     | 1.15<br>(0.20, 6.80)  | Moderate*    | NA                   | NA     |
| <i>S. boulardii</i> vs. LGG                   | 1.22<br>(0.41, 3.66)  | Moderate†    | 0.75<br>(0.15, 3.84) | High†ψ |
| <i>L. casei</i> vs. <i>L. rhamnosus</i>       | 0.99<br>(0.08, 12.56) | Low†‡        | NA                   | NA     |
| <i>L. acidophilus</i> vs. <i>L. rhamnosus</i> | 1.48<br>(0.14, 16.07) | Moderate‡    | NA                   | NA     |
| <i>L. reuteri</i> vs. <i>L. rhamnosus</i>     | 0.46<br>(0.02, 9.01)  | Moderate*†‡ψ | NA                   | NA     |
| <i>L. plantarum</i> vs. <i>L. rhamnosus</i>   | 2.20<br>(0.10, 46.18) | Low*‡        | NA                   | NA     |
| <i>B. clausii</i> vs. <i>L. rhamnosus</i>     | 0.86<br>(0.06, 12.69) | Low*‡        | NA                   | NA     |
| <i>S. boulardii</i> vs. <i>L. rhamnosus</i>   | 0.91<br>(0.09, 9.30)  | Low†‡        | NA                   | NA     |
| <i>L. acidophilus</i> vs. <i>L. casei</i>     | 1.49<br>(0.33, 6.78)  | High         | NA                   | NA     |
| <i>L. reuteri</i> vs. <i>L. casei</i>         | 0.46<br>(0.04, 4.81)  | Moderate*†ψ  | NA                   | NA     |
| <i>L. plantarum</i> vs. <i>L. casei</i>       | 2.22<br>(0.20, 25.08) | Very low*†‡  | NA                   | NA     |
| <i>B. clausii</i> vs. <i>L. casei</i>         | 0.86<br>(0.12, 6.19)  | Very low*†‡  | NA                   | NA     |
| <i>S. boulardii</i> vs. <i>L. casei</i>       | 0.92<br>(0.22, 3.79)  | Moderate†    | NA                   | NA     |
| <i>L. reuteri</i> vs. <i>L. acidophilus</i>   | 0.31<br>(0.03, 2.73)  | Highψ        | NA                   | NA     |
| <i>L. plantarum</i> vs. <i>L. acidophilus</i> | 1.49                  | Moderate‡    | NA                   | NA     |

|                                               |                       |             |    |    |
|-----------------------------------------------|-----------------------|-------------|----|----|
|                                               | (0.15, 14.32)         |             |    |    |
| <i>B. clausii</i> vs. <i>L. acidophilus</i>   | 0.58<br>(0.10, 3.39)  | Moderate‡   | NA | NA |
| <i>S. boulardii</i> vs. <i>L. acidophilus</i> | 0.62<br>(0.20, 1.88)  | Moderate†   | NA | NA |
| <i>L. plantarum</i> vs. <i>L. reuteri</i>     | 4.82<br>(0.27, 86.32) | Moderate*‡ψ | NA | NA |
| <i>B. clausii</i> vs. <i>L. reuteri</i>       | 1.88<br>(0.15, 23.20) | Low*‡       | NA | NA |
| <i>S. boulardii</i> vs. <i>L. reuteri</i>     | 1.99<br>(0.24, 16.46) | Moderate†   | NA | NA |
| <i>B. clausii</i> vs. <i>L. plantarum</i>     | 0.39<br>(0.03, 5.18)  | Moderate*‡ψ | NA | NA |
| <i>S. boulardii</i> vs. <i>L. plantarum</i>   | 0.41<br>(0.05, 3.73)  | Moderate†‡ψ | NA | NA |
| <i>S. boulardii</i> vs. <i>B. clausii</i>     | 1.06<br>(0.20, 5.71)  | Low†‡       | NA | NA |

Abbreviations: OR=odds ratio; CI=confidence interval; NA=not applicable.

\*Limitations in study design or execution (risk of bias); †Inconsistency in results; ¶Indirectness of evidence; ‡Imprecision of results; §Publication bias; ψMagnitude of the effect.

**Table S5.2. Traditional meta-analysis results for total occurrence of adverse events.**

| Interventions                           | Trails | Participants | Effect Estimate<br>OR (95% CI) | Heterogeneity                                                        |
|-----------------------------------------|--------|--------------|--------------------------------|----------------------------------------------------------------------|
| Multi-genera II vs. Placebo             | 8      | 4204         | 0.80 (0.68, 0.94)              | P=0.00, I <sup>2</sup> =69.0% (35.3%, 85.2%), tau <sup>2</sup> =0.33 |
| Multi-genera III vs. Placebo            | 6      | 1132         | 1.33 (0.98, 1.80)              | P=0.19, I <sup>2</sup> =33.9% (0.0%, 72.9%), tau <sup>2</sup> =0.09  |
| LGG vs. Placebo                         | 3      | 305          | 0.27 (0.14, 0.52)              | P=0.60, I <sup>2</sup> =0.0%, tau <sup>2</sup> =0.00                 |
| <i>L. rhamnosus</i> vs. Placebo         | 2      | 412          | 0.39 (0.05, 2.80)              | P=0.97, I <sup>2</sup> =0.0%, tau <sup>2</sup> =0.00                 |
| <i>L. casei</i> vs. Placebo             | 2      | 156          | 0.48 (0.22, 1.04)              | P=0.20, I <sup>2</sup> =36.9% (0.0%, 80.0%), tau <sup>2</sup> =0.16  |
| <i>L. acidophilus</i> vs. Placebo       | 5      | 904          | 0.95 (0.67, 1.34)              | P=0.33, I <sup>2</sup> =13.8% (0.0%, 58.3%), tau <sup>2</sup> =0.05  |
| <i>L. reuteri</i> vs. Placebo           | 1      | 40           | 0.25 (0.06, 0.94)              | NA                                                                   |
| <i>L. plantarum</i> vs. Placebo         | 1      | 163          | 1.04 (0.20, 5.28)              | NA                                                                   |
| <i>B. clausii</i> vs. Placebo           | 1      | 100          | 0.42 (0.19, 0.91)              | NA                                                                   |
| <i>S. boulardii</i> vs. Placebo         | 6      | 1118         | 0.51 (0.36, 0.74)              | P=0.07, I <sup>2</sup> =45.0% (0.0%, 70.7%), tau <sup>2</sup> =0.18  |
| Multi-genera III vs. Multi-genera II    | 1      | 249          | 0.65 (0.23, 1.84)              | NA                                                                   |
| LGG vs. Multi-genera II                 | 1      | 43           | 1.33 (0.26, 6.83)              | NA                                                                   |
| <i>S. boulardii</i> vs. Multi-genera II | 1      | 42           | 1.00 (0.18, 5.63)              | NA                                                                   |
| <i>S. boulardii</i> vs. LGG             | 1      | 43           | 0.75 (0.15, 3.84)              | NA                                                                   |

Abbreviations: OR=odds ratio; CI=confidence interval; NA=not applicable.

**Table S5.3. SUCRA values and effectiveness ranking for occurrence of adverse event subtypes.**

| Interventions                | Abdominal or epigastric pain       |             |             | Constipation                       |             |             | Flatulence                         |             |             | Vomiting                           |             |             | Nausea                             |             |             |
|------------------------------|------------------------------------|-------------|-------------|------------------------------------|-------------|-------------|------------------------------------|-------------|-------------|------------------------------------|-------------|-------------|------------------------------------|-------------|-------------|
|                              | Network meta-analysis: OR (95% CI) | SUCRA value | Mean rank # | Network meta-analysis: OR (95% CI) | SUCRA value | Mean rank # | Network meta-analysis: OR (95% CI) | SUCRA value | Mean rank # | Network meta-analysis: OR (95% CI) | SUCRA value | Mean rank # | Network meta-analysis: OR (95% CI) | SUCRA value | Mean rank # |
| <b>Placebo</b>               | Reference                          | 26.0        | 6.9         | Reference                          | 41.9        | 5.1         | Reference                          | 26.8        | 6.1         | Reference                          | 59.2        | 3.9         | Reference                          | 18.8        | 6.7         |
| <b>Multi-genera II</b>       | 0.65<br>(0.37, 1.16)               | 56.1        | 4.5         | 0.32<br>(0.09, 1.09)               | 87.9        | 1.8         | 1.01<br>(0.79, 1.28)               | 34.6        | 5.6         | 0.49<br>(0.14, 1.75)               | 78.0        | 2.5         | 0.91<br>(0.43, 1.94)               | 29.9        | 5.9         |
| <b>Multi-genera III</b>      | 0.61<br>(0.32, 1.16)               | 40.2        | 5.8         | 1.12<br>(0.50, 2.49)               | 37.9        | 5.3         | 0.92<br>(0.59, 1.43)               | 37.3        | 5.4         | 0.68<br>(0.23, 2.03)               | 30.3        | 5.9         | 0.70<br>(0.30, 1.63)               | 47.0        | 4.7         |
| <b>LGG</b>                   | 1.21<br>(0.41, 3.61)               | 22.7        | 7.2         | 1.20<br>(0.47, 3.02)               | 36.8        | 5.4         | 0.63<br>(0.41, 0.97)               | 74.7        | 2.8         | 0.40<br>(0.04, 4.25)               | 77.7        | 2.6         | 0.48<br>(0.17, 1.35)               | 74.6        | 2.8         |
| <b><i>L. rhamnosus</i></b>   | 0.97<br>(0.17, 5.36)               | 36.8        | 6.1         | NA                                 | NA          | NA          |
| <b><i>L. casei</i></b>       | NA                                 | NA          | NA          |
| <b><i>L. acidophilus</i></b> | 0.46                               | 70.2        | 3.4         | 0.93                               | 49.6        | 4.5         | 0.63                               | 66.9        | 3.3         | 2.25                               | 29.5        | 5.9         | 0.65                               | 51.4        | 4.4         |

|                            |              |      |     |              |      |     |              |      |     |               |      |     |              |      |     |
|----------------------------|--------------|------|-----|--------------|------|-----|--------------|------|-----|---------------|------|-----|--------------|------|-----|
|                            | (0.21, 1.00) |      |     | (0.55, 1.57) |      |     | (0.28, 1.42) |      |     | (0.18, 27.80) |      |     | (0.18, 2.37) |      |     |
| <b><i>L. reuteri</i></b>   | 0.20         | 91.3 | 1.7 | 2.35         | 4.2  | 7.7 | 0.30         | 91.6 | 1.6 | 0.63          | 66.2 | 3.4 | 0.43         | 69.2 | 3.2 |
|                            | (0.05, 0.77) |      |     | (0.86, 6.39) |      |     | (0.08, 1.07) |      |     | (0.05, 8.75)  |      |     | (0.10, 1.76) |      |     |
| <b><i>L. plantarum</i></b> | NA           | NA   | NA  | NA           | NA   | NA  | NA           | NA   | NA  | NA            | NA   | NA  | NA           | NA   | NA  |
| <b><i>B. clausii</i></b>   | 0.44         | 69.3 | 3.5 | 0.49         | 80.4 | 2.4 | 0.66         | 35.5 | 5.5 | 0.21          | 27.5 | 6.1 | 0.34         | 56.3 | 4.1 |
|                            | (0.13, 1.49) |      |     | (0.20, 1.20) |      |     | (0.30, 1.47) |      |     | (0.04, 1.11)  |      |     | (0.11, 1.09) |      |     |
| <b><i>S. boulardii</i></b> | 0.89         | 37.4 | 6.0 | 0.50         | 61.3 | 3.7 | 0.97         | 32.5 | 5.7 | 1.53          | 31.6 | 5.8 | 0.64         | 52.8 | 4.3 |
|                            | (0.24, 9.02) |      |     | (0.12, 2.20) |      |     | (0.55, 1.52) |      |     | (0.23, 10.30) |      |     | (0.28, 1.46) |      |     |

Abbreviations: CI=confidence interval; OR=odds ratio; NA=not applicable; SUCRA=surface under the cumulative ranking curve.

#Rank was derived from occurrence rate values of adverse event subtypes for all studies, 1=best tolerance.

**Table S5.4. Summary table of all outcomes for efficacy and tolerability.**

| <b>Interventions</b>                        | <b>Trails</b> | <b>Participants</b> | <b>Effect Estimate<br/>OR (95% CI)</b> |
|---------------------------------------------|---------------|---------------------|----------------------------------------|
| <b>Treatment efficacy</b>                   |               |                     |                                        |
| Incidence of diarrhea                       | 51            | 9569                | 0.44 (0.36, 0.54)                      |
| <i>C. difficile</i> infection rate          | 21            | 6623                | 0.36 (0.25, 0.53)                      |
| Fever rate                                  | 5             | 1206                | 0.57 (0.35, 0.90)                      |
| Dehydration rate                            | 3             | 769                 | 0.31 (0.15, 0.67)                      |
| <b>Treatment tolerability</b>               |               |                     |                                        |
| Total occurrence rates of adverse reactions | 35            | 8157                | 0.51 (0.38, 0.68)                      |
| Abdominal or epigastric pain                | 25            | 5902                | 0.60 (0.45, 0.82)                      |
| Constipation                                | 19            | 2377                | 0.86 (0.61, 1.21)                      |
| Flatulence                                  | 24            | 5988                | 0.85 (0.71, 1.01)                      |
| Vomiting                                    | 18            | 4664                | 0.56 (0.36, 0.88)                      |
| Nausea                                      | 22            | 5195                | 0.57 (0.39, 0.84)                      |
| Loss of appetite                            | 10            | 523                 | 0.34 (0.22, 0.54)                      |
| Taste disturbance                           | 7             | 527                 | 0.83 (0.60, 1.25)                      |

Abbreviations: OR=odds ratio; CI=confidence interval.



**Figure S5.1. Forest plot of network meta-analysis for the tolerability outcomes compared with placebo arm.**

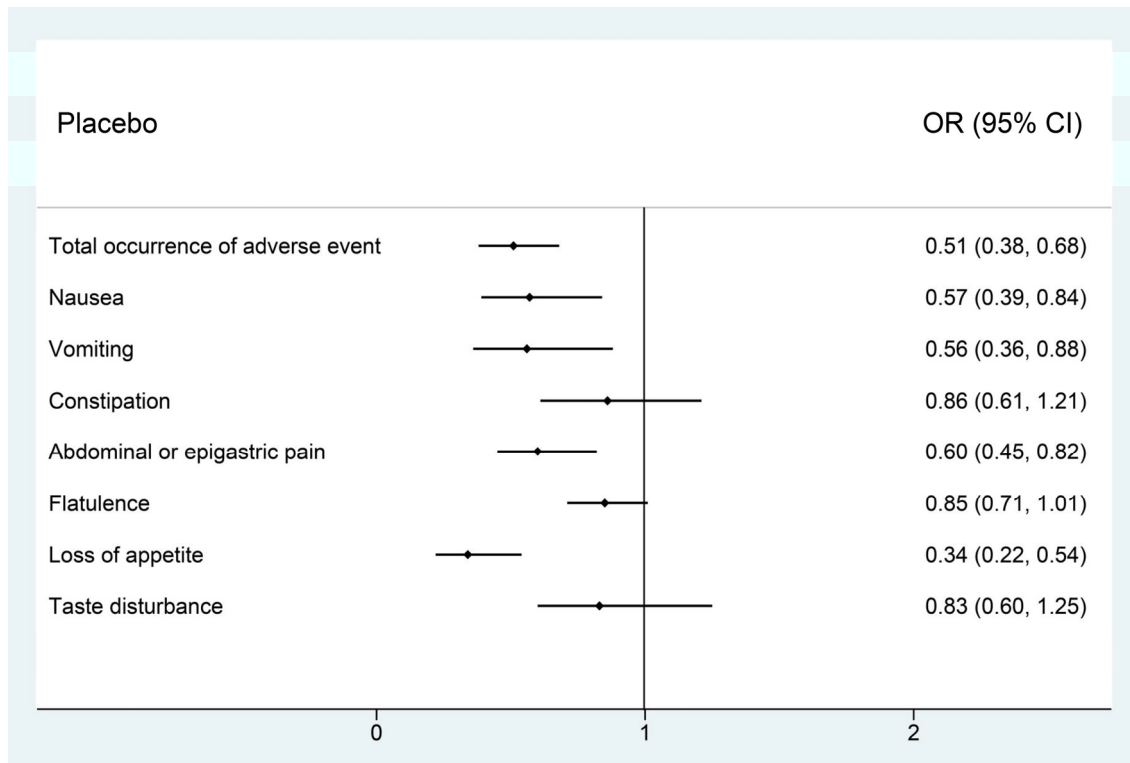

**Figure S5.2. Comparison-adjusted funnel plot of network analysis for total occurrence of adverse events compared with placebo arm.**

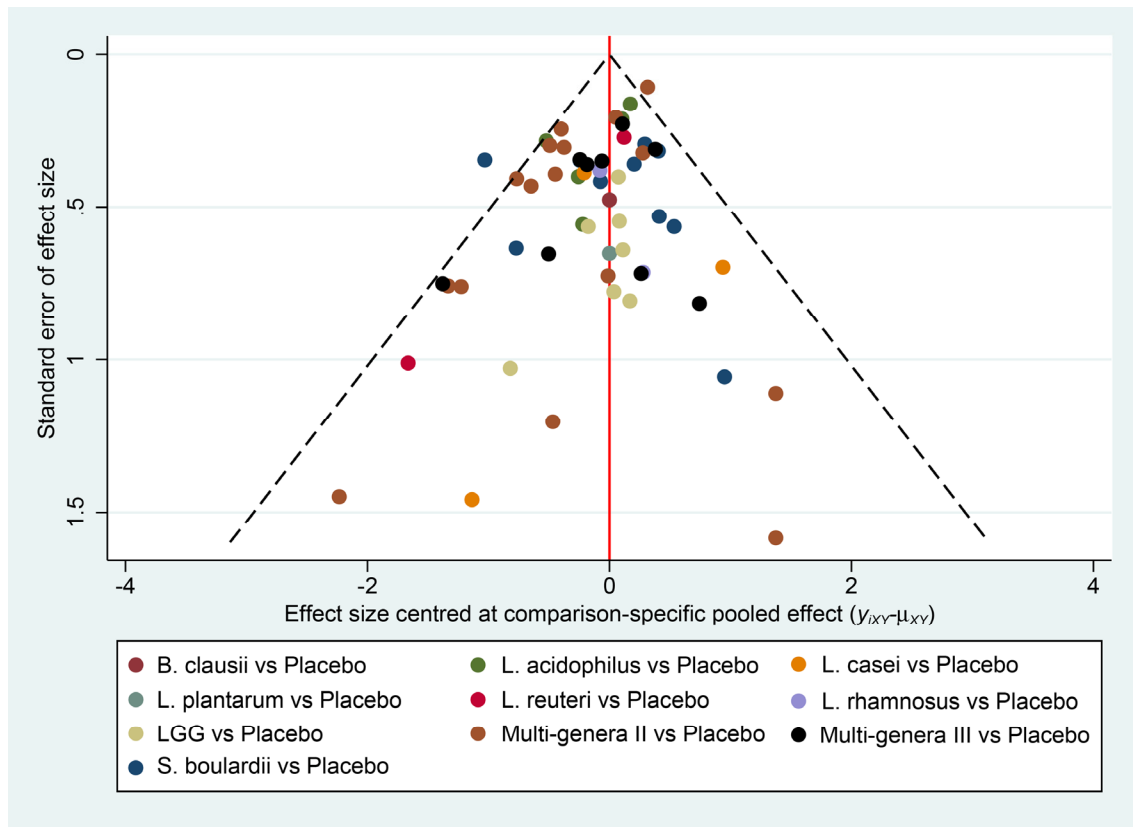

Supplement: Supplementary_Material5-R1.pdf [file Supplementary_Material5-R1.pdf]
