# Supplementary material
Source: PubMed Central journal article supplement (PMC5833232)
Supplement: Supplementary_Material1.pdf [file Supplementary_Material1.pdf]

## Supplementary Material 1: Characteristics of enrolled studies

Figure S1. Flowchart of search strategy.

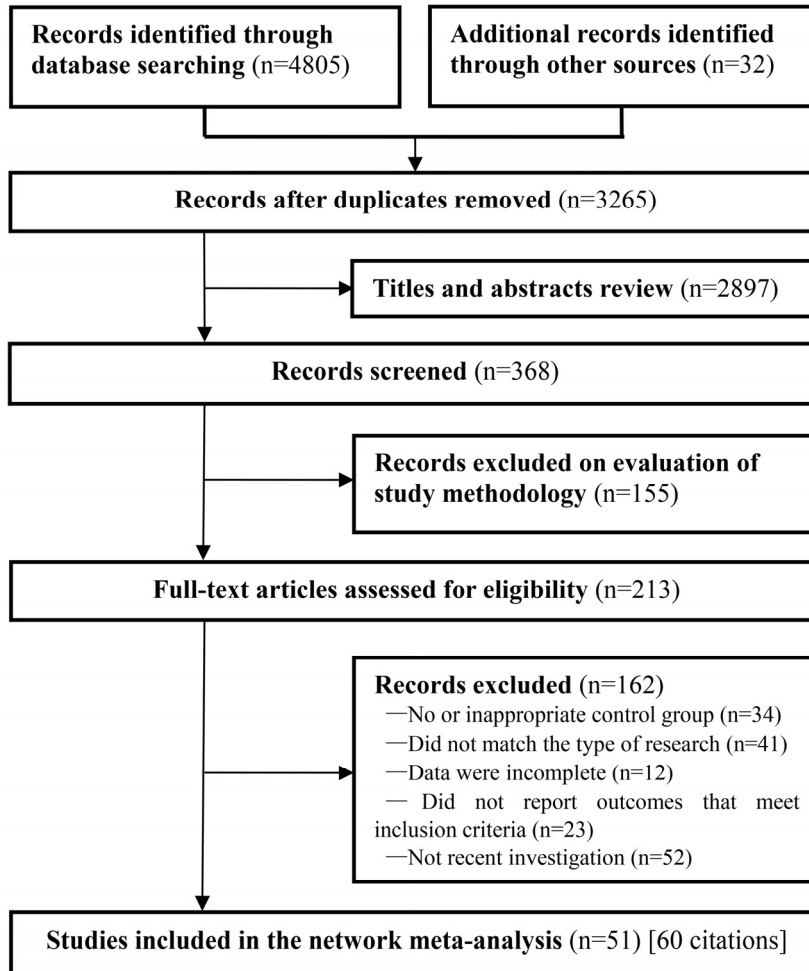

**Table S1. Main characteristics of the studies included in the systematic assessment.**

| Authors<br>(Publication year) | Recruiting area | Study design                               | Participant characteristics        |              |                         |                                             |                              | Treatment characteristics |                                                                                                                                                                                                                                                         |                |                  |          | Main outcome parameters |
|-------------------------------|-----------------|--------------------------------------------|------------------------------------|--------------|-------------------------|---------------------------------------------|------------------------------|---------------------------|---------------------------------------------------------------------------------------------------------------------------------------------------------------------------------------------------------------------------------------------------------|----------------|------------------|----------|-------------------------|
|                               |                 |                                            | Sample size (intervention/control) | Male (n,%)   | Mean age (range, years) | Antibiotic in use                           | Indication                   | Setting                   | Experimental intervention                                                                                                                                                                                                                               | Comparator arm | Dosage (CFU/day) | Duration |                         |
| <b>Ahmad et al (2013)</b>     | Iran            | RCT, double-blind                          | 66 (33/33)                         | 44 (65.7%)   | 9.09±3.12 (3~14)        | Amoxicillin, furazolidone                   | <i>H. pylori</i> eradication | Single site hospital      | <i>Lactobacillus acidophilus</i> +<br><i>Lactobacillus rhamnosus</i> +<br><i>Lactobacillus bulgaricus</i> +<br><i>Lactobacillus casei</i> +<br><i>Streptococcus thermophilus</i> +<br><i>Bifidobacterium infantis</i> +<br><i>Bifidobacterium breve</i> | Placebo        | 1 billion        | 5 weeks  | 1, 2                    |
| <b>Allen et al (2013)</b>     | UK              | RCT, double-blind, multi-center, two-group | 2941 (1471/1470)                   | 2268 (77.1%) | NA                      | Penicillin, cephalosporin, quinolones, etc. | NA                           | Multiple hospitals        | <i>Lactobacillus acidophilus</i> +<br><i>Bifidobacterium bifidum</i> +<br><i>Bifidobacterium lactis</i>                                                                                                                                                 | Placebo        | 60 billion       | 3 weeks  | 1, 2, 3                 |

|                                |         |                                               |             |            |                            |                                   |                                    |                                     |                                                                      |         |                                                                    |                                         |               |
|--------------------------------|---------|-----------------------------------------------|-------------|------------|----------------------------|-----------------------------------|------------------------------------|-------------------------------------|----------------------------------------------------------------------|---------|--------------------------------------------------------------------|-----------------------------------------|---------------|
| <b>Armuzi et al (2001)</b>     | Italy   | Prospective, RCT, double-blind, single-center | 60 (30/30)  | 25 (41.7%) | 40±12                      | Clarithromycin, tinidazole        | <i>H. pylori</i> eradication       | Asymptomatic, one teaching hospital | <i>Lactobacillus rhamnosus</i> GG                                    | Placebo | 12 billion                                                         | 2 weeks                                 | 1, 3          |
| <b>Arvola et al (1999)</b>     | Finland | RCT, double-blind                             | 119 (61/58) | NA         | 4.7 (2 weeks~1 years)      | NA                                | Acute reproductive tract infection | In-patient                          | <i>Lactobacillus rhamnosus</i> GG                                    | Placebo | 40 billion                                                         | 7~10 days                               | 1, 2, 3, 4, 5 |
| <b>Beausoleil et al (2007)</b> | Canada  | Prospective, RCT, double-blind, single-center | 89 (44/45)  | 43 (48.3%) | I: 68.8±14.5; C: 72.9±13.4 | β-lactams, macrolides, quinolones | Respiratory infection, etc.        | Single site hospital                | <i>Lactobacillus acidophilus</i> CL1285 + <i>Lactobacillus casei</i> | Placebo | 25 billion for first 2 days, 50 billion for rest of antibiotic use | Various; the duration of antibiotic use | 1, 2, 3       |
| <b>Bravo et al (2008)</b>      | Spain   | RCT                                           | 86(41/45)   | 20 (23.3%) | 49.78±20.5                 | Amoxicillin                       | Acute infection                    | Out-patient                         | <i>Saccharomyces boulardii</i>                                       | Placebo | 10.2 billion                                                       | 12 days                                 | 1             |

|                                |        |                                |               |             |                                |                                                |                                                              |                                   |                                                                                                                      |         |             |         |      |
|--------------------------------|--------|--------------------------------|---------------|-------------|--------------------------------|------------------------------------------------|--------------------------------------------------------------|-----------------------------------|----------------------------------------------------------------------------------------------------------------------|---------|-------------|---------|------|
| <b>Can et al (2006)</b>        | Turkey | Prospective, RCT, double-blind | 151 (73/78)   | 139 (92.1%) | NA                             | $\beta$ -lactams                               | NA                                                           | In-patient, one teaching hospital | <i>Saccharomyces boulardii</i>                                                                                       | Placebo | NA          | NA      | 1, 3 |
| <b>Cimpe rman et al (2011)</b> | USA    | RCT, double-blind              | 31 (15/16)    | 11 (47.8%)  | I: 42.8; C: 63.6               | $\beta$ -lactams, macrolides, quinolones, etc. | Pneumonia, chronic obstructive pulmonary disease, bronchitis | Acute general medical floor       | <i>Lactobacillus reuteri ATCC 55730</i>                                                                              | Placebo | 0.2 billion | 4 weeks | 1    |
| <b>Cindoruk et al (2007)</b>   | Turkey | Prospective, RCT, double-blind | 124 (62/62)   | 44 (35.5%)  | I: 45.82±13.35; C: 47.56±13.53 | Amoxicillin, clarithromycin                    | <i>H. pylori</i> eradication                                 | NA                                | <i>Saccharomyces boulardii</i>                                                                                       | Placebo | 1 g         | 2 weeks | 1, 3 |
| <b>Conway et al (2007) (a)</b> | UK     | RCT, double-blind, three-arm   | 238 (118/120) | 114 (42.2%) | Bio: 37.8±25.3; C: 38.2±23.5   | NA                                             | NA                                                           | Rural general practice            | <i>Streptococcus thermophilus</i> + <i>Lactobacillus acidophilus</i> + <i>Bifidobacterium anamails subsp. lactus</i> | Placebo | 1 billion   | 12 days | 1, 3 |
| <b>Conway et al</b>            | UK     | RCT, double                    | 251 (131/12)  | 111 (42.1%) | Com: 37.1±23;                  | NA                                             | NA                                                           | Rural general                     | <i>Streptococcus thermophilus</i> + <i>Lactobacillus delbrueckii</i>                                                 | Placebo | 2 billion   | 12 days | 1, 3 |

|                                           |        |                                                       |                |                   |                             |    |                                 |                                |                                                                      |         |                                   |         |      |  |
|-------------------------------------------|--------|-------------------------------------------------------|----------------|-------------------|-----------------------------|----|---------------------------------|--------------------------------|----------------------------------------------------------------------|---------|-----------------------------------|---------|------|--|
| <b>(2007)<br/>(b)</b>                     |        | -blind,<br>three-arm<br>RCT,<br>double-<br>blind,     | 0)             | %)                | C:<br>38.2±23.5             |    |                                 | practice                       | <i>bulgaris</i>                                                      |         |                                   |         |      |  |
| <b>Correa et al<br/>(2005)</b>            | Brazil | formul<br>a-contr<br>olled,<br>paralle<br>l-grou<br>p | 157<br>(80/77) | 60<br>(38.2<br>%) | 21.94±9.8;<br>C: 22.19±10.7 | NA |                                 | Hospital<br>ambulatory<br>care | <i>Bifidobacterium lactis</i> +<br><i>Streptococcus thermophilus</i> | Placebo | Approx<br>imately<br>5<br>billion | 15 days | 1, 4 |  |
| <b>Cremonini et al<br/>(2002)<br/>(a)</b> | Italy  | RCT,<br>triple-<br>blind,<br>paralle<br>l group       | 42<br>(21/21)  | 43<br>(44.3<br>%) | 18~61                       | NA | <i>H. pylori</i><br>eradication | Asymptomatic                   | <i>Lactobacillus rhamnosus</i> GG                                    | Placebo | 12<br>billion                     | 2 weeks | 1, 3 |  |
| <b>Cremonini et al<br/>(2002)<br/>(b)</b> | Italy  | RCT,<br>triple-<br>blind,<br>paralle<br>l group       | 42<br>(21/21)  | 43<br>(44.3<br>%) | 18~61                       | NA | <i>H. pylori</i><br>eradication | Asymptomatic                   | <i>Saccharomyces boulardii</i>                                       | Placebo | 10<br>billion                     | 2 weeks | 1, 3 |  |
| <b>Cremonini et al</b>                    | Italy  | RCT,<br>triple-                                       | 43<br>(22/21)  | 43<br>(44.3<br>%) | 18~61                       | NA | <i>H. pylori</i><br>eradication | Asymptomatic                   | <i>Lactobacillus acidophilus</i> +<br><i>Bifidobacterium lactis</i>  | Placebo | 10<br>billion                     | 2 weeks | 1, 3 |  |

|                              |         |                                           |               |             |                              |                                             |                                                                               |                                                          |                                                                                                                                      |         |              |          |         |
|------------------------------|---------|-------------------------------------------|---------------|-------------|------------------------------|---------------------------------------------|-------------------------------------------------------------------------------|----------------------------------------------------------|--------------------------------------------------------------------------------------------------------------------------------------|---------|--------------|----------|---------|
| <b>al (2002) (c)</b>         |         | blind, parallel group                     |               | %)          |                              |                                             | n                                                                             |                                                          |                                                                                                                                      |         |              |          |         |
| <b>de Vrese et al (2011)</b> | Germany | RCT, double-blind                         | 59 (30/29)    | NA          | NA                           | Clarithromycin, amoxicillin                 | <i>H. pylori</i> eradication                                                  | Out-patient                                              | <i>Lactobacillus acidophilus</i> LA-5 + <i>Bifidobacterium animalis</i> ssp. <i>lactis</i> BB-12 + <i>Streptococcus thermophilus</i> | Placebo | 0.75 billion | 5 weeks  | 1, 3    |
| <b>Dietrich et al (2014)</b> | Germany | RCT, double-blind                         | 258 (151/107) | 131 (50.8%) | I: 70.8±15.6; C: 70.8±16.5   | Penicillin, cephalosporin, quinolones, etc. | Pulmonary infection, genitourinary infection, biliary infection, sepsis, etc. | A large internal medicine department in primary hospital | <i>Lactobacillus casei</i> DN-114001                                                                                                 | Placebo | 20 billion   | 12 weeks | 1, 2    |
| <b>Duman et al (2005)</b>    | Turkey  | Prospective, RCT, multicenter, open label | 389 (204/185) | 190 (48.8%) | I: 45.68±12.7; C: 44.65±13.9 | Amoxicillin, clarithromycin                 | <i>H. pylori</i> eradication                                                  | Multiple hospitals                                       | <i>Saccharomyces boulardii</i>                                                                                                       | Placebo | 1 g          | 2 weeks  | 1, 2, 3 |
| <b>Engelb</b>                | USA     | RCT                                       | 40(20/2)      | 9           | 37.2                         | Amoxicillin                                 | Healthy                                                                       | Out-pati                                                 | <i>Bifidobacterium lactis</i> Bl-04                                                                                                  | Placebo | 41           | 3 weeks  | 1       |

|                                     |           |                                                                                    |                  |                |                                            |                                                |                                                        |                              |                                                                                                                                                                                     |         |                 |                                                           |      |
|-------------------------------------|-----------|------------------------------------------------------------------------------------|------------------|----------------|--------------------------------------------|------------------------------------------------|--------------------------------------------------------|------------------------------|-------------------------------------------------------------------------------------------------------------------------------------------------------------------------------------|---------|-----------------|-----------------------------------------------------------|------|
| <b>Erdev<br/>e et al<br/>(2004)</b> | Turkey    | Prospective,<br>RCT,<br>no<br>treatment<br>control<br>led                          | 466<br>(244/222) | NA             | 1~15                                       | Salbactam-<br>ampicillin,<br>azithromycin      | NA                                                     | NA                           | + <i>Bifidobacterium lactis</i><br><i>Bi-07</i> + <i>Lactobacillus acidophilus</i> NCFM +<br><i>Lactobacillus paracasei</i><br><i>Lpc-37</i> + <i>Bifidobacterium bifidum</i> Bb-02 | Placebo | NA              | NA                                                        | 1    |
| <b>Fox et<br/>al<br/>(2015)</b>     | Australia | Prospective,<br>RCT,<br>double<br>-blind,<br>parallel,<br>multisite,<br>stratified | 70<br>(34/36)    | 41<br>(58.57%) | I:<br>6.8±2.7,<br>C:<br>6.3±3.2;<br>(1~12) | β-lactams,<br>macrolides<br>,<br>tetracyclines | Otitis,<br>pharyngitis,<br>chest<br>infection,<br>etc. | Multisite<br>general<br>care | <i>Lactobacillus rhamnosus</i> GG<br>+ <i>Bifidobacterium lactis</i> Bb-12 + <i>Lactobacillus acidophilus</i> La-5                                                                  | Placebo | 19.4<br>billion | Various; the duration of<br>antibiotic use plus 1<br>week | 1, 3 |

|                             |     |                                                                                                                                                      |                |               |                               |                                              |                                                  |                         |                                                                                                                         |         |               |                                                                                                                            |         |
|-----------------------------|-----|------------------------------------------------------------------------------------------------------------------------------------------------------|----------------|---------------|-------------------------------|----------------------------------------------|--------------------------------------------------|-------------------------|-------------------------------------------------------------------------------------------------------------------------|---------|---------------|----------------------------------------------------------------------------------------------------------------------------|---------|
| <b>Gao et al (2010) (a)</b> | USA | ed<br>RCT,<br>double-blind,<br>single-center,<br>three-arm,<br>dose-ranging<br>RCT,<br>double-blind,<br>single-center,<br>three-arm,<br>dose-ranging | 170<br>(86/84) | 85<br>(50.3%) | I: 60±6;<br>C: 60±6           | Penicillin,<br>cephalosporin,<br>clindamycin | NA                                               | Single site<br>hospital | <i>Lactobacillus acidophilus</i><br><i>CL1285</i> + <i>Lactobacillus casei</i> <i>LBC80R</i>                            | Placebo | 100 billion   | 6~19 days; started within 36h of antibiotic therapy prescribed and continued 5 additional days after antibiotic completion | 1, 2, 3 |
| <b>Gao et al (2010) (b)</b> | USA | ed<br>RCT,<br>double-blind,<br>single-center,<br>three-arm,<br>dose-ranging                                                                          | 169<br>(85/84) | 88<br>(51.8%) | I: 60±6;<br>C: 60±6           | Penicillin,<br>cephalosporin,<br>clindamycin | NA                                               | Single site<br>hospital | <i>Lactobacillus acidophilus</i><br><i>CL1285</i> + <i>Lactobacillus casei</i> <i>LBC80R</i>                            | Placebo | 50 billion    | 6~19 days; started within 36h of antibiotic therapy prescribed and continued 5 additional days after antibiotic completion | 1, 2, 3 |
| <b>Hickson et al (2007)</b> | UK  | RCT,<br>double-blind                                                                                                                                 | 135<br>(69/66) | 62<br>(45.9%) | I: 73.7±11.1;<br>C: 73.9±10.5 | NA                                           | Respiratory tract<br>infection,<br>urinary tract | Three hospitals         | <i>Lactobacillus casei</i><br><i>DN-114001</i> + <i>Streptococcus thermophilus</i> +<br><i>Lactobacillus bulgaricus</i> | Placebo | 40.74 billion | Various; started within 48h of starting antibiotic therapy and continued 1 week after stopping antibiotics                 | 1       |



| Author (Year)               | Country         | Study Design                                    | n            | Success Rate (%) | Age (I; C)                   | Antibiotics                 | Pathogen                     | Setting              | Probiotic                                                                                                                                                                                                                                                                                            | Dose                           | Duration | Outcomes |
|-----------------------------|-----------------|-------------------------------------------------|--------------|------------------|------------------------------|-----------------------------|------------------------------|----------------------|------------------------------------------------------------------------------------------------------------------------------------------------------------------------------------------------------------------------------------------------------------------------------------------------------|--------------------------------|----------|----------|
| <b>Hurduc et al (2009)</b>  | Romania         | Randomized, open-trial                          | 90 (48/42)   | 39 (43.3%)       | 11.5                         | Amoxicillin, Clarithromycin | <i>H. pylori</i> eradication | Out-patient          | <i>Saccharomyces boulardii</i>                                                                                                                                                                                                                                                                       | Antibiotics-only 500 mg        | 4 weeks  | 1, 3     |
| <b>Kim et al (2008)</b>     | Korea           | Prospective, open-labeled study                 | 347(168/179) | 160 (46.1%)      | I: 48.1 ±12.4; C: 53.7 ±12.0 | Clarithromycin, amoxicillin | <i>H. pylori</i> eradication | Out-patient          | <i>Lactobacillus acidophilus</i> HY 2177 + <i>Lactococcus casei</i> HY 2743 + <i>Bifidobacterium longum</i> HY 8001 + <i>Streptococcus thermophilus</i> B-1                                                                                                                                          | Antibiotics-only 101.2 million | >3 weeks | 1, 3     |
| <b>Konin g et al (2008)</b> | The Netherlands | RCT, double-blind, placebo-controlled, parallel | 38 (19/19)   | NA               | 18~65                        | Amoxicillin                 | NA                           | Single site hospital | <i>Bifidobacterium bifidum</i> + <i>Bifidobacterium lactis</i> + <i>Bifidobacterium longum</i> + <i>Enterococcus faecium</i> + <i>Lactobacillus acidophilus</i> + <i>Lactobacillus paracasei</i> + <i>Lactobacillus plantarum</i> + <i>Lactobacillus rhamnosus</i> + <i>Lactobacillus salivarius</i> | Placebo 10 billion             | 2 weeks  | 1, 2, 3  |
| <b>Konin g et al (2010)</b> | The Netherlands | RCT, double-blind,                              | 30 (17/13)   | 19 (63.3%)       | I: 59.9 ±13.3; C: 63.4       | Care as usual               | Chronic obstructive          | Single site hospital | <i>Bifidobacterium bifidum</i> + <i>Bifidobacterium lactis</i> + <i>Enterococcus faecium</i> +                                                                                                                                                                                                       | Placebo 9 billion              | 2 weeks  | 1        |

|                               |        |                   |                  |               |                                        |                                                                          |                                                                          |                                         |                                                                                                                                                                                   |         |             |                                                                                                                 |         |
|-------------------------------|--------|-------------------|------------------|---------------|----------------------------------------|--------------------------------------------------------------------------|--------------------------------------------------------------------------|-----------------------------------------|-----------------------------------------------------------------------------------------------------------------------------------------------------------------------------------|---------|-------------|-----------------------------------------------------------------------------------------------------------------|---------|
|                               | ds     | paralle<br>l      |                  |               | ±7.4                                   |                                                                          | pulmonary<br>disease                                                     |                                         | <i>Lactobacillus acidophilus</i> +<br><i>Lactobacillus paracasei</i> +<br><i>Lactobacillus plantarum</i> +<br><i>Lactobacillus rhamnosus</i> +<br><i>Lactobacillus salivarius</i> |         |             |                                                                                                                 |         |
| <b>Kotowska et al (2005)</b>  | Poland | RCT, double-blind | 246<br>(119/127) | 121<br>(50%)  | I: 39.3±29;<br>C: 39.3±4.1             | Cefuroxime, amoxicillin, penicillin, clarithromycin, roxithromycin, etc. | Bronchitis, otitis, pneumonia, tonsillitis, reproductive tract infection | Three teaching hospital and two clinics | <i>Saccharomyces boulardii</i>                                                                                                                                                    | Placebo | 500 mg      | NA                                                                                                              | 1, 2, 3 |
| <b>Lionetti et al (2006)</b>  | Italy  | RCT               | 40<br>(20/20)    | 21<br>(52.5%) | I: 11.0 (3.3~18);<br>C: 9.9 (4.3~17.6) | Amoxicillin, clarithromycin, tinidazole                                  | <i>H. pylori</i> eradication                                             | Out-patient                             | <i>Lactobacillus reuteri ATCC 55730</i>                                                                                                                                           | Placebo | 0.1 billion | 20 days                                                                                                         | 1, 3    |
| <b>Lonnemark et al (2010)</b> | Sweden | RCT, double-blind | 163<br>(80/83)   | 79<br>(48.5%) | I:47; C: 43                            | NA                                                                       | Air way infection, skin/soft tissue infection,                           | Single site hospital                    | <i>Lactobacillus plantarum</i>                                                                                                                                                    | Placebo | 10 billion  | Various; started within 48h of the introduction of antibiotic therapy and continued 1 week after termination of | 1, 2, 3 |

| Author (Year)                  | Country | Study Design                   | n           | I (%)      | I: (95% CI)                   | C: (95% CI)                 | Intervention                      | Control                       | Setting                                                                                                                                                                                                                                                                                                                                                       | Probiotic | Placebo                | Duration | Outcomes |
|--------------------------------|---------|--------------------------------|-------------|------------|-------------------------------|-----------------------------|-----------------------------------|-------------------------------|---------------------------------------------------------------------------------------------------------------------------------------------------------------------------------------------------------------------------------------------------------------------------------------------------------------------------------------------------------------|-----------|------------------------|----------|----------|
| <b>Merenstein et al (2009)</b> | USA     | RCT, double-blind              | 125 (61/64) | 64 (51.2%) | I: 2.9±1.5;<br>C: 3.2±1.3     | NA                          | Upper respiratory tract infection | Primary care office           | <i>Lactococcus lactis</i> +<br><i>Lactococcus plantarum</i> +<br><i>Lactococcus rhamnosus</i> +<br><i>Lactococcus casei</i> +<br><i>Lactococcus lactis subsp. diacetylactis</i> + <i>Leuconostoc cremoris</i> + <i>Bifidobacterium longum</i> + <i>Bifidobacterium breve</i> + <i>Lactobacillus acidophilus</i> +<br><i>Saccharomyces florentinus</i> (yeast) | Placebo   | NA                     | 10 days  | 1, 3     |
| <b>Morrow et al (2010)</b>     | USA     | Prospective, RCT, double-blind | 146 (73/73) | 60 (42.0%) | I: 52.5±19.3;<br>C: 54.6±16.3 | NA                          | Ventilator-associated pneumonia   | Single site hospital          | <i>Lactobacillus rhamnosus</i> GG                                                                                                                                                                                                                                                                                                                             | Placebo   | 4 billion              | NA       | 1, 3     |
| <b>Myllyluoma et al (2005)</b> | Finland | RCT, double-blind              | 47 (23/24)  | 18 (38.3%) | I: 55.6 (24-69)               | Amoxicillin, clarithromycin | <i>H. pylori</i> eradication      | Small companies near research | <i>Lactobacillus rhamnosus</i> GG + <i>Lactobacillus rhamnosus</i> LC705 + <i>Bifidobacterium breve</i> Bb99 +                                                                                                                                                                                                                                                | Placebo   | 13 billion for first 1 | 4 weeks  | 1, 3     |

|                                  |         |                                               |               |             |                                    |                                                       |                                                      |                                                           |                                                                                                                                                              |                                             |              |                                                             |         |
|----------------------------------|---------|-----------------------------------------------|---------------|-------------|------------------------------------|-------------------------------------------------------|------------------------------------------------------|-----------------------------------------------------------|--------------------------------------------------------------------------------------------------------------------------------------------------------------|---------------------------------------------|--------------|-------------------------------------------------------------|---------|
|                                  |         |                                               |               |             |                                    |                                                       | center                                               | <i>Propionibacterium freudenreichii ssp. shermanii JS</i> |                                                                                                                                                              | week, 6.5 billion for the following 3 weeks |              |                                                             |         |
| <b>Nista et al (2004)</b>        | Italy   | Prospective, RCT, double-blind, single center | 106 (54/52)   | 55 (48.2%)  | I: 46±13; C: 43±13                 | Amoxicillin, clarithromycin                           | <i>H. pylori</i> eradication                         | Single site hospital                                      | <i>Bacillus clausii</i>                                                                                                                                      | Placebo                                     | 6 billion    | 2 weeks                                                     | 1, 3    |
| <b>Ouwehand et al (2014) (a)</b> | Finland | RCT, triple-hand, dose-response               | 335 (168/167) | 168 (50%)   | High dose: 50.5±11.0; C: 50.0±11.0 | Broad spectrum penicillin, cephalosporin, clindamycin | Respiratory tract infection, urinary tract infection | Single site hospital                                      | <i>Lactobacillus acidophilus</i> + <i>Lactobacillus plaracasei</i> <i>Lpc-37</i> + <i>Bifidobacterium lactis Bi-07</i> + <i>Bifidobacterium lactis Bl-04</i> | Placebo                                     | 4.17 billion | 10~21 days; length of antibiotic administration plus 1 week | 1, 2, 3 |
| <b>Ouwehand et al</b>            | Finland | RCT, triple-hand,                             | 335 (168/167) | 168 (50.2%) | Low dose: 49.3±11.                 | Broad spectrum penicillin,                            | Respiratory tract infection,                         | Single site hospital                                      | <i>Lactobacillus acidophilus</i> + <i>Lactobacillus plaracasei</i> <i>Lpc-37</i> + <i>Bifidobacterium</i>                                                    | Placebo                                     | 17 billion   | 10~21 days; length of antibiotic administration plus 1      | 1       |

|                 |        |         |         |       |             |              |             |           |                                     |         |         |                          |      |
|-----------------|--------|---------|---------|-------|-------------|--------------|-------------|-----------|-------------------------------------|---------|---------|--------------------------|------|
| <b>(2014)</b>   |        | dose-r  |         |       | 4; C:       | cephalospo   | urinary     |           | <i>lactis Bi-07 +</i>               |         |         | week                     |      |
| <b>(b)</b>      |        | espons  |         |       | 50.0±11.    | rin,         | tract       |           | <i>Bifidobacterium lactis Bl-04</i> |         |         |                          |      |
|                 |        | e       |         |       | 0           | clindamyci   | infection   |           |                                     |         |         |                          |      |
|                 |        |         |         |       |             | n            |             |           |                                     |         |         |                          |      |
| <b>Plum</b>     |        |         |         |       |             |              |             |           |                                     |         |         |                          |      |
| <b>mer et</b>   |        |         |         |       |             |              |             |           |                                     |         |         |                          |      |
| <b>al</b>       | UK     | RCT,    | 138     | NA    | NA          | NA           | NA          | In-patien | <i>Lactobacillus acidophilus +</i>  | Placebo | 20      | 20 days                  | 1, 2 |
| <b>(2004)</b>   |        | double  | (69/69) |       |             |              |             | t         | <i>Bifidobacterium bifidum</i>      |         | billion |                          |      |
|                 |        | -blind  |         |       |             |              |             |           |                                     |         |         |                          |      |
|                 |        |         |         |       |             |              |             |           |                                     |         |         |                          |      |
| <b>Pozzo</b>    |        |         |         |       |             |              |             |           |                                     |         |         |                          |      |
| <b>ni et al</b> | Italy  | RCT,    | 204     | 137   | I:79.9±9    | β-lactams,   | NA          | Single    | <i>Saccharomyces boulardii</i>      | Placebo | 10      | Various; started within  | 1,   |
| <b>(2012)</b>   |        | double  | (106/98 | (39.8 | .9; C:      | quinolones   |             | site      |                                     |         | billion | 48h of the start of      | 2, 3 |
|                 |        | -blind, | )       | %)    | 78.5±9.7    | , etc.       |             | hospital  |                                     |         |         | antibiotic therapy and   |      |
|                 |        | single- |         |       |             |              |             |           |                                     |         |         | continued 1 week after   |      |
|                 |        | center, |         |       |             |              |             |           |                                     |         |         | discontinuation of       |      |
|                 |        | paralle |         |       |             |              |             |           |                                     |         |         | antibiotics              |      |
|                 |        | l-grou  |         |       |             |              |             |           |                                     |         |         |                          |      |
|                 |        | p       |         |       |             |              |             |           |                                     |         |         |                          |      |
| <b>Ruszcz</b>   |        |         |         |       |             | Penicillins, | Otitis,     | Two       |                                     |         |         |                          |      |
| <b>ynski</b>    | Poland | RCT,    | 240     | 110   | I: 54.8±45. | broad        | upper       | hospitals | <i>Lactobacillus</i>                |         | 4       | Various; the duration of | 1,   |
| <b>et al</b>    |        | double  | (120/12 | (45.9 | 3;C:        | spectrum     | respiratory | and one   | <i>rhamnosus (E/N, Oxy and</i>      | Placebo | billion | the antibiotic treatment | 2, 3 |
| <b>(2008)</b>   |        | -blind  | 0)      | %)    | 53.5±44.    | penicillin,  | tract       | private   | <i>Pen)</i>                         |         |         |                          |      |
|                 |        |         |         |       | 25          | cephalospo   | infection,  | practice  |                                     |         |         |                          |      |
|                 |        |         |         |       |             | rin,         | lower       |           |                                     |         |         |                          |      |
|                 |        |         |         |       |             | macrolides   | respiratory |           |                                     |         |         |                          |      |

|                              |        |                                  |               |             |                            |                                                                                                                                      |                      |                                                               |         |                                                       |                                                                                                                                           |         |
|------------------------------|--------|----------------------------------|---------------|-------------|----------------------------|--------------------------------------------------------------------------------------------------------------------------------------|----------------------|---------------------------------------------------------------|---------|-------------------------------------------------------|-------------------------------------------------------------------------------------------------------------------------------------------|---------|
| <b>Safdar et al (2008)</b>   | USA    | RCT, double-blind, single-center | 39 (23/16)    | 39 (97.5%)  | I: 66.56±14.53; C:72.47±11 | β-lactams, clindamycin, urinary tract infection, etc. Pulmonary infection, urinary tract infection, skin/soft tissue infection, etc. | Single site hospital | <i>Lactobacillus acidophilus</i>                              | Placebo | 60 billion                                            | 2 weeks                                                                                                                                   | 1, 2, 3 |
| <b>Sampalis et al (2010)</b> | Canada | RCT, double-blind, multi-center  | 437 (216/221) | 234 (53.5%) | I: 59.5±18.1; C: 58.1±19.1 | β-lactams, macrolides, quinolones, clindamycin, etc.                                                                                 | 8 Canadian centers   | <i>Lactobacillus acidophilus CLI285 + Lactobacillus casei</i> | Placebo | 25 billion for first 2 days, 50 billion for remaining | Various; administered within 24h after the first dose of antibiotics and continued 5 days following the termination of antibiotic regimen | 1, 2, 3 |

| Author (Year)            | Country | Study Design                                 | n                | NA             | I (%)                 | C (%) | Intervention                                                       | Control                                              | Probiotic             | Intervention                                                           | Dose             | Treatment Period | Outcomes |      |
|--------------------------|---------|----------------------------------------------|------------------|----------------|-----------------------|-------|--------------------------------------------------------------------|------------------------------------------------------|-----------------------|------------------------------------------------------------------------|------------------|------------------|----------|------|
| <b>Shan et al (2013)</b> | China   | RCT                                          | 283<br>(139/144) | NA             | 4                     |       | Cefepime, cefoperazone, sulbactam, amoxicillin, erythromycin, etc. | Pneumonia, asthma, lower respiratory tract infection | Single site hospital  | <i>Saccharomyces boulardii</i>                                         | Placebo          | 500 mg           | 2 weeks  | 1, 3 |
| <b>Sheu et al (2002)</b> | China   | RCT                                          | 160<br>(80/80)   | 78<br>(48.8%)  | I: 47.8;<br>C: 45.9   |       | Amoxicillin, clarithromycin                                        | <i>H. pylori</i> eradication                         | Out-patient           | <i>Lactobacillus + Bifidobacterium</i>                                 | Antibiotics-only | 10 billion       | 1 week   | 1, 3 |
| <b>Song et al (2010)</b> | Korea   | Prospective, RCT, double-blind, multi-center | 214<br>(103/111) | 132<br>(61.7%) | I: 61±15;<br>C: 60±16 |       | β-lactams, macrolides, quinolones, etc.                            | Pulmonary infection                                  | 10 tertiary hospitals | <i>Lactobacillus rhamnosus R0011 + Lactobacillus acidophilus R0052</i> | Placebo          | 4 billion        | 2 weeks  | 1, 3 |
| <b>Souza et al</b>       | Brazil  | RCT, double                                  | 70<br>(35/35)    | 32<br>(45.7)   | I: 56.17±2            |       | β-lactams, quinolones                                              | NA                                                   | In-patient, single    | <i>Lactobacillus casei + Bifidobacterium breve</i>                     | Placebo          | 1.83 billion     | Various  | 1, 3 |

|                               |        |                                                         |               |               |                                   |                                              |                                               |                                              |                                                                                                                                                        |         |                |                                                      |      |
|-------------------------------|--------|---------------------------------------------------------|---------------|---------------|-----------------------------------|----------------------------------------------|-----------------------------------------------|----------------------------------------------|--------------------------------------------------------------------------------------------------------------------------------------------------------|---------|----------------|------------------------------------------------------|------|
| <b>(2012)</b>                 |        | -blind                                                  |               | %)            | 0.47; C:<br>54±21.8<br>4          | , etc.                                       |                                               | site<br>hospital                             |                                                                                                                                                        |         |                |                                                      |      |
| <b>Sullivan et al (2003)</b>  | Sweden | RCT                                                     | 24<br>(12/12) | 7<br>(29.2%)  | 28<br>(21~48)                     | Clindamycin                                  | Healthy                                       | Out-patient                                  | <i>Lactobacillus acidophilus</i> NCFB 1748 +<br><i>Bifidobacterium lactis</i> Bb 12<br>+ <i>Lactobacillus paracasei</i><br><i>subsp. paracasei</i> F19 | Placebo | 50<br>billion  | 2 weeks                                              | 1    |
| <b>Sykorak et al (2005)</b>   | UK     | Prospective,<br>RCT,<br>double-blind,<br>parallel-group | 86<br>(39/47) | 34<br>(39.5%) | I: 12.6±3.3<br>; C: 12.9±3.7      | Amoxicillin,<br>clarithromycin               | <i>H. pylori</i><br>eradication               | 3 sites<br>hospital<br>general<br>care       | <i>Lactobacillus casei</i><br><i>DN-114001</i>                                                                                                         | Placebo | 10<br>billion  | 1 week                                               | 1, 3 |
| <b>Szajewski et al (2009)</b> | Poland | RCT,<br>double-blind                                    | 64<br>(34/30) | 39<br>(47%)   | I: 12.3±2.7<br>; C: 11.9±3.1      | Amoxicillin,<br>clarithromycin               | <i>H. pylori</i><br>eradication               | In-patient                                   | <i>Lactobacillus rhamnosus</i> GG                                                                                                                      | Placebo | 2<br>billion   | 1 week                                               | 1, 3 |
| <b>Szymanski et al (2008)</b> | Poland | RCT,<br>double-blind                                    | 78<br>(40/38) | 44<br>(56.4%) | I: 8<br>(3~14);<br>C: 7<br>(1~15) | Amoxicillin,<br>penicillin,<br>cephalosporin | Otitis,<br>respiratory<br>tract<br>infection, | Pediatric<br>hospitals<br>and<br>out-patient | <i>Bifidobacterium longum</i><br><i>PL03</i> + <i>Lactobacillus</i><br><i>rhamnosus</i> KL53A +<br><i>Lactobacillus plantarum</i>                      | Placebo | 0.2<br>billion | Various; the duration of<br>the antibiotic treatment | 1, 3 |



| Author (Year)                  | Country | Study Design                   | n           | Events (%)  | CI                                  | Intervention                           | Comparison                                                 | Setting                            | Strain                                     | Intervention     | Duration | Outcomes                                                             |         |
|--------------------------------|---------|--------------------------------|-------------|-------------|-------------------------------------|----------------------------------------|------------------------------------------------------------|------------------------------------|--------------------------------------------|------------------|----------|----------------------------------------------------------------------|---------|
| <b>Thomson et al (2001)</b>    | USA     | Prospective, RCT, double-blind | 150 (65/85) | 143 (53.6%) | I: 57.2±18;<br>C: 54.4±17.4         | β-lactams, macrolides, etc.            | NA                                                         | In-patient in single site hospital | <i>Lactobacillus rhamnosus</i> GG          | Placebo          | 2 weeks  | 20 billion                                                           | 1       |
| <b>Tursi et al (2004)</b>      | Italy   | Prospective, RCT               | 70 (35/35)  | 40 (57.1%)  | I: 58.2 (27~71);<br>C: 54.3 (31~66) | Amoxicillin, tinidazole                | <i>H. pylori</i> eradication                               | Out-patient                        | <i>Lactobacillus casei subsp. casei</i> DG | Antibiotics-only | 10 days  | 16 billion                                                           | 1, 3    |
| <b>Vanderhoof et al (1999)</b> | USA     | RCT, double-blind              | 184 (88/96) | 85 (45.2%)  | 4                                   | Amoxicillin, clarithromycin, cefprozil | Otitis, pharyngitis, bronchitis, dermatological, sinusitis | Pediatric hospital                 | <i>Lactobacillus rhamnosus</i> GG          | Placebo          | 10 days  | 10 billion for children weighing <12 kg, 20 billion for weighing >12 | 1, 4, 5 |

| Author (Year)      | Country | Study Design                               | n             | I (%)       | I: Mean (SD)            | Intervention                          | Condition                    | Site                 | Probiotic                                                                                                                                                     | Control          | Dose            | Duration | Outcomes |
|--------------------|---------|--------------------------------------------|---------------|-------------|-------------------------|---------------------------------------|------------------------------|----------------------|---------------------------------------------------------------------------------------------------------------------------------------------------------------|------------------|-----------------|----------|----------|
| Wenus et al (2008) | Norway  | RCT, double-blind                          | 87 (46/41)    | 41 (47.1%)  | 58.8±16.5; C: 56.2±18.7 | β-lactams (more than 60% patients)    | NA                           | Single site hospital | <i>Lactobacillus rhamnosus</i> GG + <i>Lactobacillus acidophilus</i> La-5 + <i>Bifidobacterium lactis</i> Bb-12                                               | Placebo          | 52.5 billion kg | 2 weeks  | 1, 2     |
| Yoon et al (2011)  | Korea   | Prospective, RCT, open-label               | 337 (151/186) | 151 (44.8%) | 53.7±11.1; C: 55.0±12.5 | Moxifloxacin, amoxicillin             | <i>H. pylori</i> eradication | Out-patient          | <i>Lactobacillus acidophilus</i> HY 2177 + <i>Lactobacillus casei</i> HY 2743 + <i>Bifidobacterium longum</i> HY 8001 + <i>Streptococcus thermophilus</i> B-1 | Antibiotics-only | 15.18 billion   | 4 weeks  | 1, 3     |
| Zheng et al (2012) | China   | Prospective, RCT, multi-center, open-label | 372 (193/179) | 244 (65.6%) | 13.9±9.3; C: 15.8±10    | Penicillin, cephalosporin, macrolides | Pneumonia                    | In-patient           | <i>Clostridium butyricum</i> + <i>Bifidobacterium infantis</i>                                                                                                | Placebo          | 5 billion       | 1 week   | 1        |

Abbreviations: NA=Not applicable; *H. pylori*=*Helicobacter pylori*; CFU=Colony forming unit; C=control; I=intervention; RCT=randomized controlled trials; 1=incidence of diarrhea; 2=*Clostridium difficile* infection rate; 3=total occurrence of adverse events; 4=mean duration of diarrhea; 5=mean stool frequency.
