# Supplementary material
Source: PubMed Central journal article supplement (PMC5833232)
Supplement: Supplementary_Material3.pdf [file Supplementary_Material3.pdf]

### Supplementary Material 3: Methodological quality assessment

Figure S3. Graph of quality assessment results.

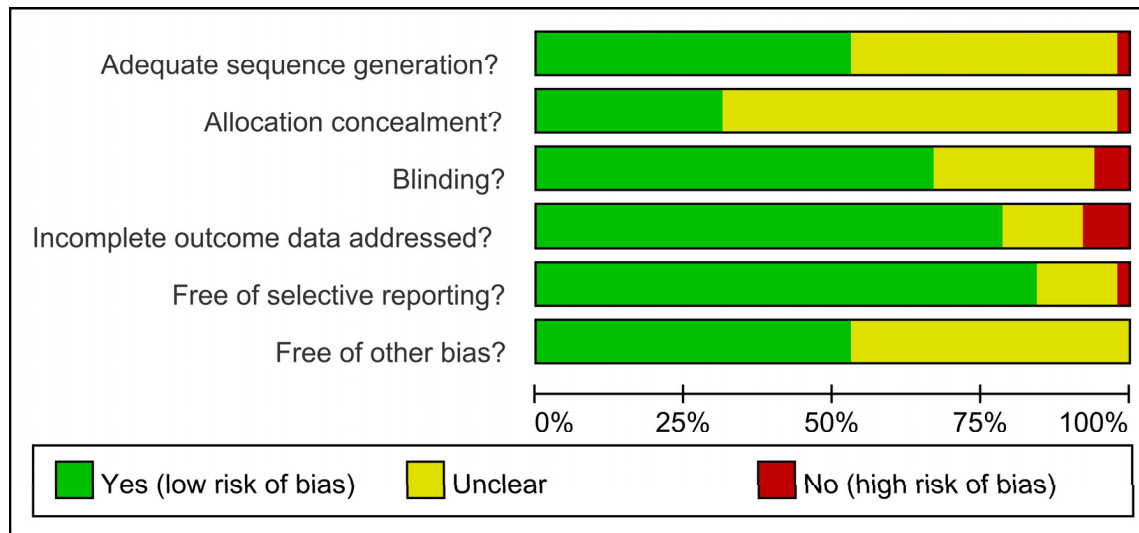

**Table S3. Summary of quality assessment results.**

| Publication (year)         | Selection bias             |                        | Performance bias | Detection bias | Attrition bias | Reporting bias | Other bias |
|----------------------------|----------------------------|------------------------|------------------|----------------|----------------|----------------|------------|
|                            | Random sequence generation | Allocation concealment |                  |                |                |                |            |
| Ahmad et al (2013)         | L                          | L                      | L                | U              | L              | L              | L          |
| Allen et al (2013)         | L                          | L                      | L                | L              | L              | L              | L          |
| Armuzzi et al (2001)       | U                          | U                      | L                | L              | U              | L              | L          |
| Arvola et al (1999)        | L                          | U                      | L                | L              | H              | L              | L          |
| Beausoleil et al (2007)    | U                          | U                      | L                | L              | L              | L              | L          |
| Bravo et al (2008)         | U                          | U                      | L                | L              | L              | L              | L          |
| Can et al (2006)           | U                          | U                      | L                | L              | U              | U              | U          |
| Cimperman et al (2011)     | U                          | U                      | L                | U              | L              | L              | L          |
| Cindoruk et al (2007)      | L                          | L                      | L                | L              | L              | L              | U          |
| Conway et al (2007)        | L                          | L                      | L                | H              | U              | L              | L          |
| Correa et al (2005)        | U                          | U                      | L                | L              | L              | L              | U          |
| Cremonini et al (2002)     | L                          | L                      | L                | L              | L              | L              | U          |
| de Vrese et al (2011)      | U                          | U                      | L                | L              | U              | U              | U          |
| Dietrich et al (2014)      | L                          | L                      | L                | U              | L              | U              | L          |
| Duman et al (2005)         | U                          | U                      | L                | L              | L              | L              | U          |
| Engelbrektson et al (2009) | U                          | U                      | U                | U              | U              | L              | L          |
| Erdeve et al (2004)        | L                          | U                      | U                | U              | H              | L              | U          |
| Fox et al (2015)           | L                          | L                      | L                | L              | L              | L              | L          |
| Gao et al (2010)           | L                          | L                      | L                | L              | L              | L              | U          |

|                                 |   |   |   |   |   |   |   |
|---------------------------------|---|---|---|---|---|---|---|
| <b>Hickson et al (2007)</b>     | U | U | L | L | L | L | L |
| <b>Hurduc et al (2009)</b>      | U | U | U | L | L | L | U |
| <b>Kim et al (2008)</b>         | L | U | U | U | L | L | L |
| <b>Koning et al (2008)</b>      | U | U | L | U | L | L | L |
| <b>Koning et al (2010)</b>      | L | U | U | U | L | L | L |
| <b>Kotowska et al (2005)</b>    | L | L | L | L | L | L | U |
| <b>Lionetti et al (2006)</b>    | U | U | U | L | L | U | U |
| <b>Lonnermark et al (2010)</b>  | U | U | L | U | L | L | U |
| <b>Merenstein et al (2009)</b>  | U | U | L | L | L | L | L |
| <b>Morrow et al (2010)</b>      | L | U | U | L | L | L | L |
| <b>Myllyluoma et al (2005)</b>  | L | U | L | U | L | L | U |
| <b>Nista et al (2004)</b>       | U | U | U | L | L | L | U |
| <b>Ouwehand et al (2014)</b>    | L | L | L | U | L | L | U |
| <b>Plummer et al (2003)</b>     | L | U | L | L | U | L | U |
| <b>Pozzoni et al (2012)</b>     | U | U | L | L | L | U | L |
| <b>Ruszczynski et al (2008)</b> | L | L | L | U | L | L | L |
| <b>Safdar et al (2008)</b>      | U | U | L | U | L | L | U |
| <b>Sampalis et al (2010)</b>    | U | U | L | U | L | L | L |
| <b>Shan (2013)</b>              | L | L | L | H | H | L | U |
| <b>Sheu et al (2002)</b>        | H | U | L | L | L | L | U |
| <b>Song et al (2010)</b>        | U | L | L | L | L | L | L |
| <b>Souza et al (2012)</b>       | U | U | L | L | U | L | U |
| <b>Sullivan et al (2003)</b>    | U | U | L | L | L | L | L |
| <b>Sykora et al (2005)</b>      | L | L | L | L | L | L | L |

|                                |   |   |   |   |   |   |   |
|--------------------------------|---|---|---|---|---|---|---|
| <b>Szajewska et al (2009)</b>  | L | L | L | L | H | L | L |
| <b>Szymanski et al (2008)</b>  | L | L | L | L | L | L | U |
| <b>Thomas et al (2001)</b>     | L | U | L | L | L | L | L |
| <b>Tursi et al (2004)</b>      | U | U | L | L | L | L | U |
| <b>Vanderhoof et al (1999)</b> | L | U | L | L | L | L | U |
| <b>Wenus et al (2008)</b>      | U | U | L | U | L | H | L |
| <b>Yoon et al (2011)</b>       | L | U | L | L | L | L | L |
| <b>Zheng et al (2012)</b>      | L | H | L | H | L | L | U |

Abbreviations: H=high risk of bias; L=low risk of bias; U=unclear risk of bias.
